# Supplementary material for: Molecular Dynamics of a Thermostable Multicopper Oxidase from Thermus thermophilus HB27: Structural Differences between the Apo and Holo Forms
Source: PubMed Central journal article supplement (PMC3393687; doi:10.1371/journal.pone.0040700), 2012-07-10
Supplement: pone.0040700.s006.pdf [file pone.0040700.s006.pdf]

**Table S1.** Correlated motions found in the apo and holo form of *Tth*-MCO and corresponding bonded or non-bonded interactions.

| Secondary structure                                                                                                | Interactions                                                                                                                                                     |
|--------------------------------------------------------------------------------------------------------------------|------------------------------------------------------------------------------------------------------------------------------------------------------------------|
| Domain 1                                                                                                           |                                                                                                                                                                  |
| loop ( $\beta 1$ - $\beta 2$ )/loop ( $\beta 4$ - $\beta 5$ ) <sup>a</sup>                                         | HB:D78(sc)-S35(sc)-G37(bb), R75(sc)-Q36(sc)                                                                                                                      |
| loop ( $\beta 3$ - $\beta 4$ )/loop ( $\alpha 1$ - $\beta 9$ ) <sup>a</sup>                                        | VdW:L151(bb)-F67(sc), HB:L151(bb)-G69(bb)                                                                                                                        |
| $\beta 1$ /loop ( $\beta 5$ - $\beta 6$ ) <sup>a</sup>                                                             | SB:K43(sc)-E85(sc), HB:E85(bb)-S45(bb)-A46(bb)                                                                                                                   |
| $\beta 4$ /( $\alpha 1$ ) <sup>a</sup>                                                                             | SB: R73(sc)-E157(sc), HB:R73(bb)-E157(bb)                                                                                                                        |
| $\beta 5$ / $\beta 7$ <sup>a</sup>                                                                                 | SB:R81(sc)-E121(sc), HB:W118(bb)-Leu84(bb), Y120(bb)-L82(bb), T119(bb)-T83(bb)                                                                                   |
| loop ( $\beta 5$ - $\beta 6$ )/ loop ( $\beta 8$ - $\alpha 1$ ) <sup>a</sup>                                       | SB:E90(sc)-R141(sc), HB:L138(bb)-T92(bb), H137(bb)-N93(bb)                                                                                                       |
| $\alpha 2$ - $\alpha 3$ -helix <sub>D1-D2</sub> / (loop( $\beta 24$ - $\beta 25$ ) <sub>D2-D3</sub> ) <sup>b</sup> | VdW:L327(sc)-E168(bb), L160(sc)-L333(bb), I163(sc)-L333(bb), P164(sc)-P330(sc), HB:E165(sc)-K331(bb).                                                            |
| Domain 2                                                                                                           |                                                                                                                                                                  |
| $\beta 10$ / $\beta 15$ <sup>a</sup>                                                                               | SB:E171(sc)-R221(sc), E171(sc)-R223(sc), HB:T219(bb)-E170(bb), L176(bb)-L225(bb), R221(bb)-H172(bb), R223(bb)-H172(bb), VdW:L224(sc)-L174(sc), L222(sc)-H172(bb) |
| $\beta 10$ / loop ( $\beta 15$ - $\beta 16$ ) <sup>b</sup>                                                         | SB: D178(sc)-R231(sc), 1VdW:L176(bb)-A227(bb), HB:S228(sc)-D178(bb)                                                                                              |
| $\beta 17$ /(loop( $\beta 24$ - $\beta 25$ ) <sub>D2-D3</sub> ) <sup>b</sup>                                       | VdW:L329(sc)-T243(sc), L333(sc)-I245(sc)                                                                                                                         |
| $\beta 15$ / $\beta 20$ <sup>b</sup>                                                                               | SB: R221(sc)-E270(sc), R223(sc)-E270(sc),VdW:L225(bb)-R268(bb), HB:L224(bb)-A269(bb), L222(bb)-V271(bb), L220(bb)-V273(bb)                                       |
| $\beta 16$ / loop ( $\beta 18$ - $\beta 19$ ) <sup>b</sup>                                                         | SB:R234(sc)-E260(sc)                                                                                                                                             |
| loop ( $\beta 20$ - $\beta 21$ ) / (loop( $\beta 24$ - $\beta 25$ ) <sub>D2-D3</sub> ) <sup>b</sup>                | VdW:P324(sc)-L275(bb), HB:E278(sc)-N323(sc)                                                                                                                      |
| loop ( $\beta 17$ - $\beta 18$ )/ $\beta 20$ <sup>a</sup>                                                          | SB:D248(sc)-K268(sc)                                                                                                                                             |
| loop ( $\beta 17$ - $\beta 18$ )/ loop ( $\beta 31$ - $\beta 32$ ) <sub>D3</sub> <sup>b</sup>                      | SB:D248(sc)-K418(sc), HB:G249(bb)-W417(bb)                                                                                                                       |
| Domain 3                                                                                                           |                                                                                                                                                                  |
| $\beta 25$ / $\beta 28$ <sup>a</sup>                                                                               | SB:R346(sc)-E381(sc), R347(sc)-E384(sc), R347(sc)-E386(sc),VdW:V349(bb)-E386(bb), L350(bb)-R387(bb), W383(bb)-Arg346(bb)                                         |
| loop ( $\beta 28$ - $\beta 29$ )/loop ( $\beta 32$ - $\beta 33$ ) <sup>a</sup>                                     | SB:D392(sc)-K424(sc), HB:K424(bb)-G389(bb), A425(bb)-Q388(bb)                                                                                                    |
| $\beta 28$ / $\beta 33$ <sup>a</sup>                                                                               | SB:E384(sc)-R430(sc)                                                                                                                                             |
| loop ( $\beta 29$ - $\beta 30$ ) /loop( $\beta 33$ - $\beta 34$ ) <sup>a</sup>                                     | SB:H400(sc)-E437(sc)                                                                                                                                             |
| $\beta 29$ / $\beta 32$ <sup>b</sup>                                                                               | HB :L423(bb)-H393(bb)                                                                                                                                            |
| $\beta 29$ /( $\alpha 5$ ) <sup>b</sup>                                                                            | $\Pi$ :H393(sc)-Cu463-H450(sc)                                                                                                                                   |
| $\beta 34$ / $\beta 35$ <sup>a</sup>                                                                               | SB:R440(sc)-E460(sc), HB:V461(bb)-G439(sc)                                                                                                                       |
| $\beta 27$ / $\beta 35$ <sup>a</sup>                                                                               | SB: K374(sc)-E460(sc), HB: L373(bb)-E460bb), G375(bb)-E460(bb)                                                                                                   |

HB, hydrogen bond; SB, salt bridge; VdW, van der Waals interactions;  $\Pi$ , pi interactions; sc, side-chain; bb, backbone.  $\alpha 2$ - $\alpha 3$ -helix<sub>D1-D2</sub> = linker between the domain 1 and 2, loop( $\beta 24$ - $\beta 25$ )<sub>D2-D3</sub>= linker between the domain 2 and 3. Found for both systems<sup>a</sup>, found only for holo*Tth*-MCO<sup>b</sup>.
